# Supplementary material for: A New Approach of Extraction of α-Amylase/trypsin Inhibitors from Wheat (Triticum aestivum L.), Based on Optimization Using Plackett–Burman and Box–Behnken Designs
Source: PubMed Central journal article supplement (PMC6803881; doi:10.3390/molecules24193589), 2019-10-05
Supplement: molecules-24-03589-s001.pdf [file molecules-24-03589-s001.pdf]

## Supplementary Material

### **A new approach of extraction of $\alpha$ -amylase/trypsin inhibitors from wheat based on optimization using Plackett–Burman and Box–Behnken designs**

Sorel Tchewonpi Sagu <sup>1</sup>, Gerd Huschek <sup>2</sup>, Josephine Bönick<sup>1,2</sup>, Thomas Homann<sup>1</sup> and Harshadrai M. Rawel<sup>1,\*</sup>

1. Institute of Nutritional Science, University of Potsdam, Arthur-Scheunert-Allee 114-116, 14558 Nuthetal, Potsdam, Germany; sorelsagu@uni-potsdam.de (S.S.) ; homann@uni-potsdam.de (T.H.)
2. IGV-Institut für Getreideverarbeitung GmbH, Arthur-Scheunert-Allee 40/41, D-14558, Nuthetal OT Bergholz-Rehbrücke, Germany; gerd.huschek@igv-gmbh.de (G.H.)

\* Corresponding author.

Tel: +49-33200-88-5525/5578 (H.R.)

E-mail: rawel@uni-potsdam.de

## Content

**Figure S1.** Extraction process of ATIs using mixtures of chloroform/methanol (C/M) or dichloromethane/methanol (D/M) as extraction solvents

**Figure S2.** Protein profiles of (a) *Julius* extract and (b) *Ponticus* extract for different experimental conditions of the Doehlert design determined by SDS-PAGE

**Table S1.** Experimental factors and their level in Doehlert design

**Table S2.** Solvent gradient during HPLC fractionation

**Table S3.** Weighted effects of extraction time sodium chloride concentration and pH on experimental responses expressed in percent

**Table S4.** Factor coefficients estimated after analysis of Doehlert design and their corresponding  $R^2$  and  $A_f$

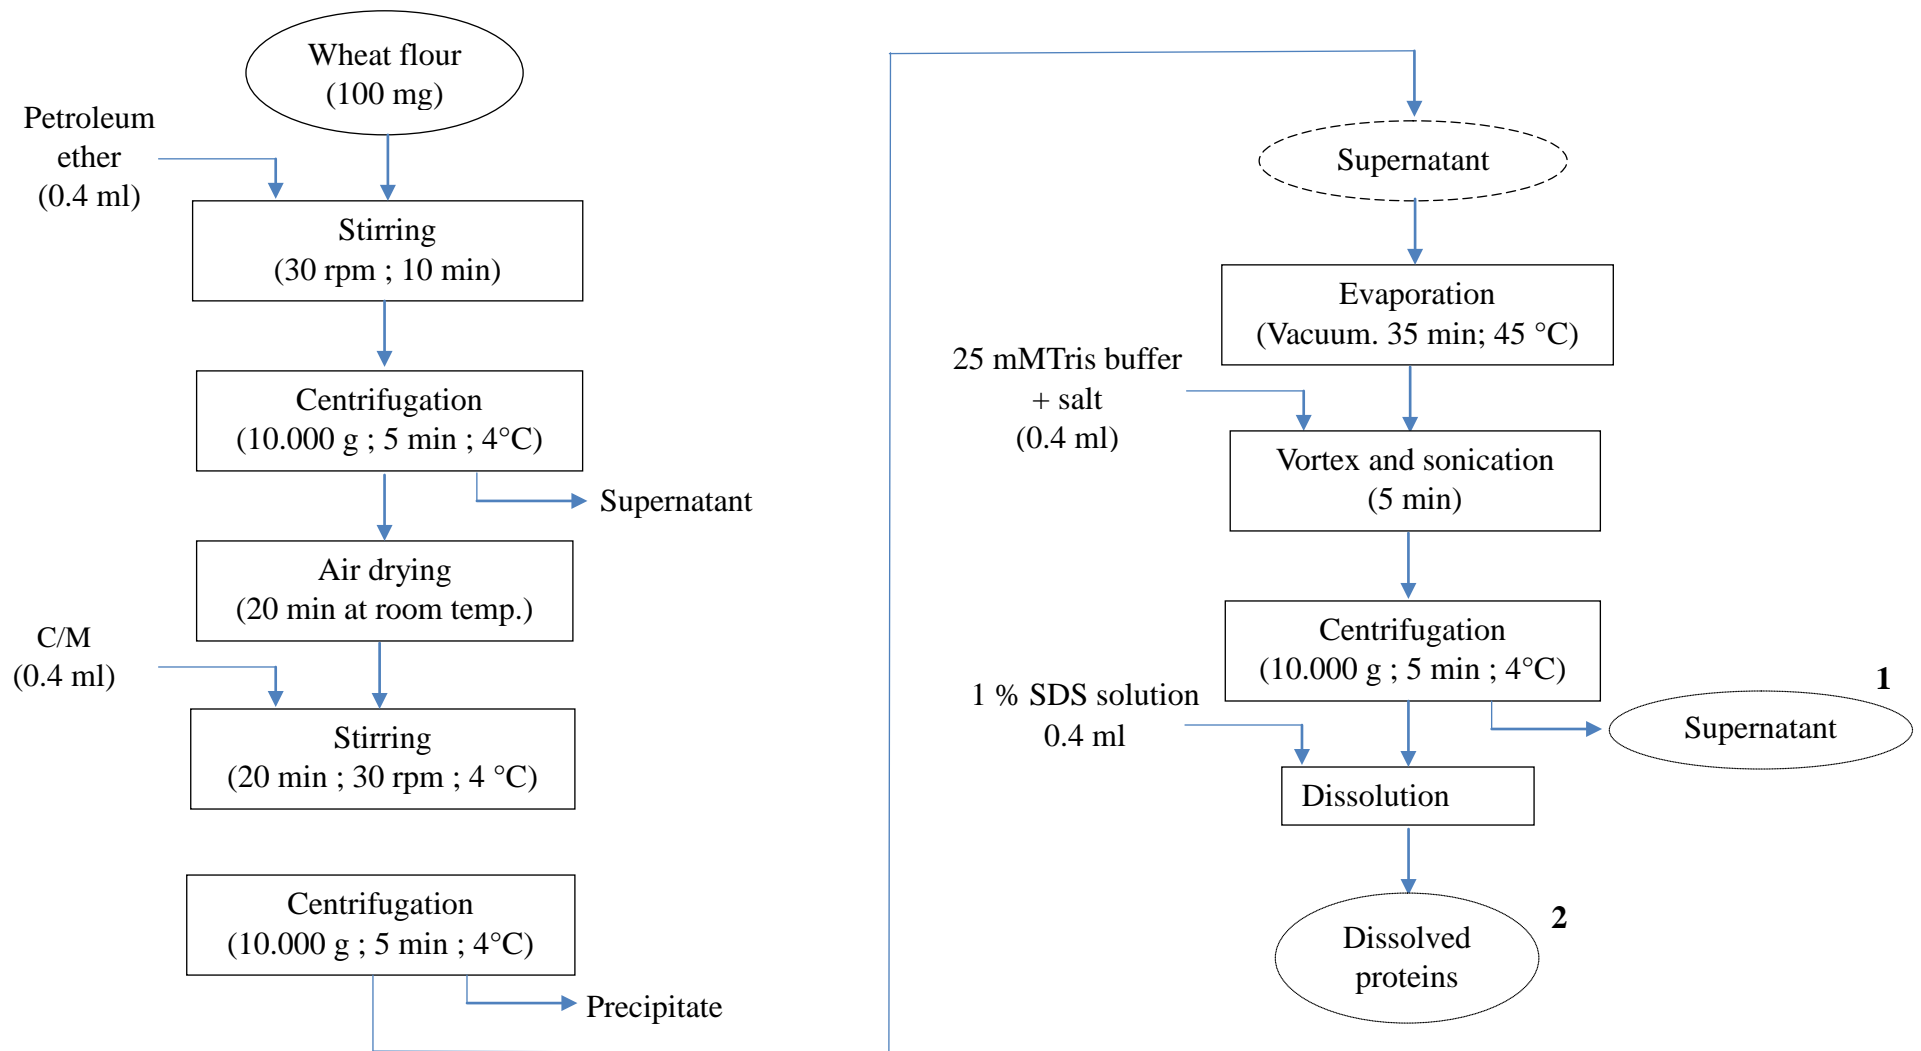

**Figure S1.** Process flow chart of wheat amylase/trypsin extraction using mixtures of chloroform/methanol (C/M) or dichloromethane/methanol (D/M) as extraction solvents. Sample 1 contains the ATIs and Sample 2 contains other proteins of higher molecular weights.

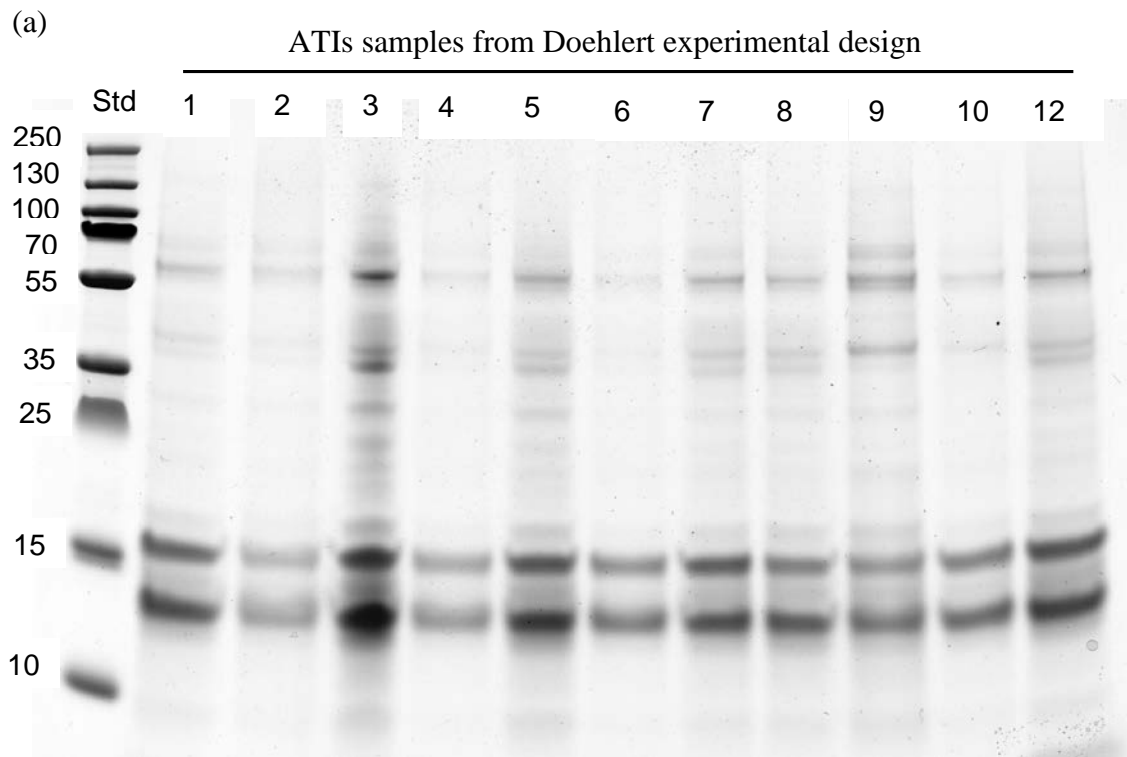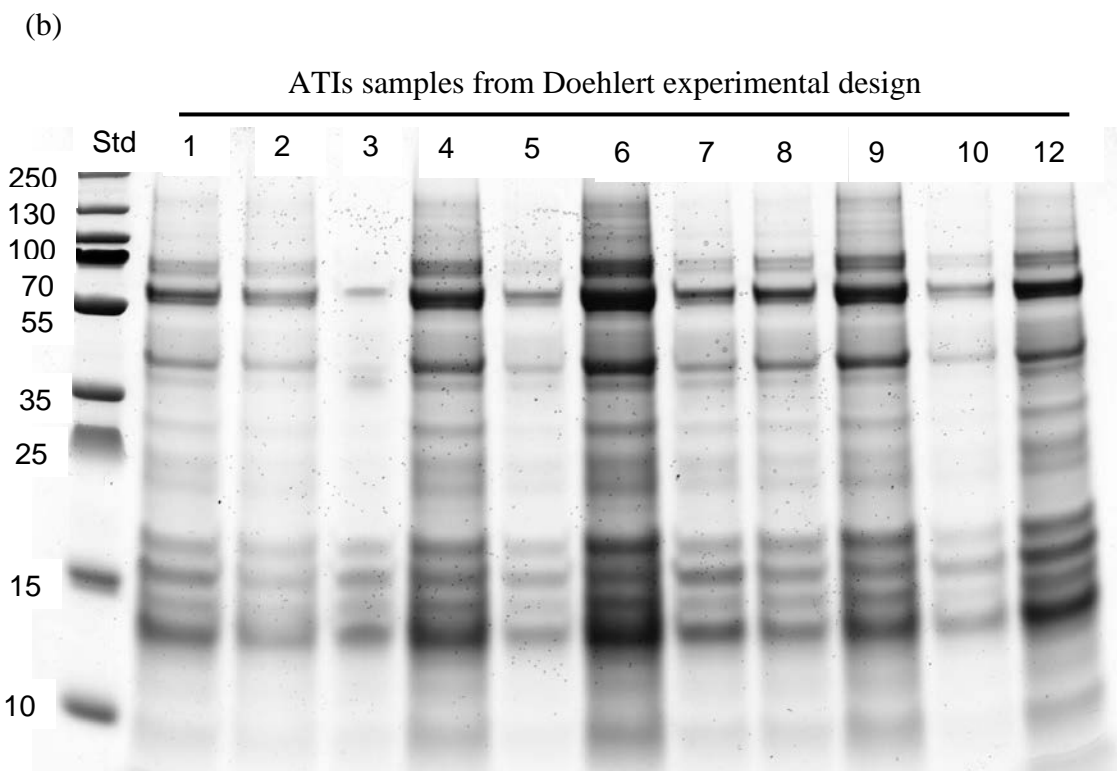

**Figure S2.** Protein profiles of selected (a) *Julius* extract and (b) *Ponticus* extract for different experimental conditions of the Doehlert design determined by SDS-PAGE

**Table S1.** Experimental factors and their level in Doehlert design

| <b>Factor</b> | <b>Factor significance</b>    | <b>Low level</b> | <b>High level</b> |
|---------------|-------------------------------|------------------|-------------------|
| $X_6$         | Extraction time (min)         | 30               | 180               |
| $X_8$         | pH (/)                        | 7                | 9                 |
| $X_{10}$      | Salt concentration (molarity) | 0.2              | 1.8               |

**Table S2.** Solvent gradient during HPLC fractionation

| <b>Time (min)</b> | <b>Command</b>       | <b>Value (%)</b> |
|-------------------|----------------------|------------------|
| 0.1               | Pump B concentration | 0                |
| 3.0               | Pump B concentration | 5                |
| 10.0              | Pump B concentration | 10               |
| 20.0              | Pump B concentration | 50               |
| 23.0              | Pump B concentration | 100              |
| 26.0              | Pump B concentration | 100              |
| 28.0              | Pump B concentration | 0                |
| 33.0              | Pump B concentration | 0                |
| 33.0              | Stop controller      |                  |

Solutions of 0.1% trifluoroacetic acid (TFA) and 70% acetonitrile (ACN) were used as eluent A and B, respectively. Elution was carried out at a flow rate of 1 ml/min.

**Table S3.** Weighted effects of extraction time sodium chloride concentration and pH on experimental responses expressed in percent

| Factors            | Coeff.   | <i>Julius</i>  |            |            |            |                    | <i>Ponticus</i> |            |            |            |                    |       |             |
|--------------------|----------|----------------|------------|------------|------------|--------------------|-----------------|------------|------------|------------|--------------------|-------|-------------|
|                    |          | Coeff. Protein | Effect (%) | Coeff. IAA | Effect (%) | Sum of effects (%) | Coeff. Protein  | Effect (%) | Coeff. IAA | Effect (%) | Sum of effects (%) |       |             |
| <b>Constance</b>   | $b_0$    | 0.472          |            | 71.5       |            |                    | 0.406           |            | 60.62      |            |                    |       |             |
| <b>Linear</b>      |          |                |            |            |            |                    |                 |            |            |            |                    |       |             |
| $X_{10}$           | $b_1$    | -0.071         | 13.9       | -1.0       | 2.1        | 8.0                | <b>29.6</b>     | -0.213     | 14.7       | -13.8      | 22.7               | 18.7  | <b>44.1</b> |
| $X_6$              | $b_2$    | 0.086          | 16.7       | -1.7       | 3.6        | 10.2               |                 | -0.115     | 8.0        | 5.1        | 8.4                | 8.2   |             |
| $X_8$              | $b_3$    | 0.102          | 19.9       | -1.4       | 3.1        | 11.5               |                 | -0.149     | 10.3       | -14.6      | 24.1               | 17.2  |             |
| <b>Quadratic</b>   |          |                |            |            |            |                    |                 |            |            |            |                    |       |             |
| $X_{10} * X_{10}$  | $b_{11}$ | 0.023          | 4.5        | 11.4       | 24.8       | 14.6               | <b>49.0</b>     | 0.089      | 6.2        | -0.2       | 0.4                | 3.3   | <b>25.0</b> |
| $X_6 * X_6$        | $b_{22}$ | -0.047         | 9.1        | 11.5       | 25.1       | 17.1               |                 | 0.156      | 10.8       | -14.4      | 23.7               | 17.2  |             |
| $X_8 * X_8$        | $b_{33}$ | 0.098          | 19.1       | 7.1        | 15.4       | 17.2               |                 | 0.112      | 7.8        | -0.8       | 1.3                | 4.5   |             |
| <b>Interaction</b> |          |                |            |            |            |                    |                 |            |            |            |                    |       |             |
| $X_{10} * X_6$     | $b_{12}$ | -0.017         | 3.4        | -1.6       | 3.5        | 3.4                | <b>21.4</b>     | -0.208     | 14.4       | -1.9       | 3.1                | 8.7   | <b>30.9</b> |
| $X_{10} * X_8$     | $b_{13}$ | 0.031          | 6.0        | -6.7       | 14.6       | 10.3               |                 | 0.049      | 3.4        | -8.8       | 14.5               | 9.0   |             |
| $X_6 * X_8$        | $b_{23}$ | -0.039         | 7.6        | 3.6        | 7.8        | 7.7                |                 | 0.356      | 24.6       | -1.1       | 1.9                | 13.2  |             |
| <b>Total</b>       |          | 0.514          | 100.0      | 46.0       | 100.0      | 100.0              | <b>100.0</b>    | 1.447      | 100.0      | 60.8       | 100.0              | 100.0 | 100.0       |

$X_6$  is extraction time.  $X_8$  the pH and  $X_{10}$  sodium chloride concentrations.

**Table S4.** Regression coefficients and analysis of variance for protein concentration and IAA from Plackett–Burman design

|                                        | <i>Julius</i> |                 |        |                 | <i>Poncticus</i> |                 |       |                 |
|----------------------------------------|---------------|-----------------|--------|-----------------|------------------|-----------------|-------|-----------------|
|                                        | Protein       |                 | IAA    |                 | Protein          |                 | IAA   |                 |
|                                        | Coeff.        | <i>p</i> -value | Coeff. | <i>p</i> -value | Coeff.           | <i>p</i> -value | Coeff | <i>p</i> -value |
| Constant                               | 0.404         |                 | 63.79  |                 | 0.387            |                 | 59.99 |                 |
| Type of solvent, X <sub>1</sub>        | 0.010         | 0.1128          | -1.10  | 0.5492          | 0.015            | 0.0659          | -0.21 | 0.7529          |
| Composition of solvent, X <sub>2</sub> | -0.003        | 0.6749          | -4.20  | 0.0376*         | 0.005            | 0.4777          | -2.31 | 0.0052*         |
| Ratio samples/solvent, X <sub>3</sub>  | -0.012        | 0.0695          | 4.68   | 0.0234*         | -0.021           | 0.0172*         | 1.40  | 0.0580          |
| Concentration Urea, X <sub>4</sub>     | 0.008         | 0.2226          | 3.35   | 0.0866          | -0.001           | 0.8942          | -5.69 | 0.0000*         |
| Temperature, X <sub>5</sub>            | 0.016         | 0.0196*         | -4.33  | 0.0332*         | -0.008           | 0.2882          | 1.07  | 0.1334          |
| Time, X <sub>6</sub>                   | -0.024        | 0.0016*         | 4.72   | 0.0224*         | 0.022            | 0.0128*         | -3.76 | 0.0001*         |
| Stirringspeed, X <sub>7</sub>          | -0.004        | 0.4877          | 3.83   | 0.0543          | -0.021           | 0.0189*         | 3.16  | 0.0006*         |
| pH, X <sub>8</sub>                     | 0.015         | 0.0254*         | 4.80   | 0.0206*         | 0.018            | 0.0338*         | 5.35  | 0.0000*         |
| Type ofsalt, X <sub>9</sub>            | -0.175        | 0.0000*         | -20.78 | 0.0000*         | -0.137           | 0.0000*         | -     | 0.0000*         |
| Concentrationofsalt, X <sub>10</sub>   | -0.055        | 0.0000*         | -9.79  | 0.0089*         | -0.039           | 0.0014*         | -5.46 | 0.0000*         |
| Centrifugationspeed, X <sub>11</sub>   | 0.008         | 0.1788          | 0.86   | 0.6392          | 0.008            | 0.3112          | 1.08  | 0.1308          |

\* Significant values
